# Supplementary material for: Changes in Food Consumption During the COVID-19 Pandemic: Analysis of Consumer Survey Data From the First Lockdown Period in Denmark, Germany, and Slovenia
Source: PubMed Central journal article supplement (PMC7982667; doi:10.3389/fnut.2021.635859), 2021-03-08
Supplement: Presentation_1.pdf [file Presentation_1.pdf]

## Supplementary material: Tables 1-4, Figures 1-2

**Table S1:** Examples of government lockdown measures in place in Denmark, Germany and Slovenia in April 2020

|                                              | Denmark                                                                                                                                                                                                                       | Germany                                                                                                                               | Slovenia                                                                                                                                                                                          |
|----------------------------------------------|-------------------------------------------------------------------------------------------------------------------------------------------------------------------------------------------------------------------------------|---------------------------------------------------------------------------------------------------------------------------------------|---------------------------------------------------------------------------------------------------------------------------------------------------------------------------------------------------|
| Day care institutions, Schools, Universities | All schools, kindergartens and day care institutions fully closed until April 15; primary schools and day care institutions reopened mid-April<br>Universities closed                                                         | All schools, kindergartens and day care institutions fully closed<br>Universities closed                                              | All schools, kindergartens and day care institutions fully closed<br>Universities closed                                                                                                          |
| Workplaces                                   | All non-essential workplaces in the public sector closed<br>Private sector recommended to close or restrict numbers                                                                                                           | Many non-essential workplaces in the public sector closed<br>Private sector recommended to close or restrict numbers                  | All non-essential workplaces in the public sector closed<br>Private sector recommended to close or restrict numbers                                                                               |
| International travel                         | Non-essential international travel forbidden<br>Very limited international travel services                                                                                                                                    | Non-essential international travel forbidden<br>Very limited international travel services                                            | Non-essential international travel forbidden<br>Airports closed for passenger transport                                                                                                           |
| National travel                              | No limit to personal movement<br>Public transport continued operating                                                                                                                                                         | Travel restrictions between and within some federal states<br>Public transport continued operating                                    | Personal movement restricted to within own municipality<br>Shut down of all public transport (train, bus)                                                                                         |
| Restaurants                                  | Closed (both indoor and outdoor)<br>Takeaway and delivery services still allowed                                                                                                                                              | Closed (both indoor and outdoor)<br>Takeaway and delivery services still allowed                                                      | Closed (both indoor and outdoor)<br>Takeaway and delivery services still allowed                                                                                                                  |
| Food stores                                  | Remained open<br>Some stores extended opening hours to ease access and spread customer numbers<br>A few stores voluntary offered exclusive access to more vulnerable people (elderly and chronically ill) for a few hours/day | Remained open<br>Mandatory use of face masks introduced on April 27                                                                   | Remained open<br>Government advice to limit frequency of food purchases<br>Mandatory use of face masks<br>Closure of stores on Sundays<br>Access restricted to elderly people between 8 and 10 am |
| Non-essential stores                         | Closed until April 20                                                                                                                                                                                                         | Shops smaller than 800 square metres reopened from April 20<br>Mandatory use of face masks introduced on April 27                     | Closed<br>Mandatory use of face masks                                                                                                                                                             |
| Private gatherings                           | Limited to ten persons, indoors and outdoors                                                                                                                                                                                  | Indoor gatherings forbidden, also in private homes<br>Outdoor gatherings restricted to two persons or persons from the same household | Private gatherings in public places limited to five persons (except for persons from the same household)                                                                                          |
| Other                                        | Government advice to stay home and limit contacts                                                                                                                                                                             | Government advice to stay home and limit contacts<br>Playgrounds closed                                                               | Government advice to stay home and limit contacts                                                                                                                                                 |

**Table S2:** Multinomial logistic regression models on changes in food consumption frequencies – Denmark

| Predictor variables                                | Model 1                  | Model 2                  | Model 3                  | Model 4                  | Model 5                  | Model 6                  | Model 7                  | Model 8                  | Model 9                  | Model 10                 | Model 11                 |
|----------------------------------------------------|--------------------------|--------------------------|--------------------------|--------------------------|--------------------------|--------------------------|--------------------------|--------------------------|--------------------------|--------------------------|--------------------------|
|                                                    | Fresh fruit & vegetables | Fresh meat               | Fresh fish               | Bread                    | Dairy products           | Frozen food              | Canned food              | Ready-made meals         | Cake & biscuits          | Sweets & chocolate       | Alcoholic drinks         |
| Odds ratios (in brackets: 95% confidence interval) |                          |                          |                          |                          |                          |                          |                          |                          |                          |                          |                          |
| Food shopping frequency                            | <b>0.90 (0.86; 0.94)</b> | <b>0.91 (0.87; 0.95)</b> | 0.96 (0.91; 1.02)        | <b>0.90 (0.85; 0.94)</b> | <b>0.94 (0.88; 0.99)</b> | 1.00 (0.96; 1.05)        | 0.99 (0.94; 1.04)        | 1.05 (0.97; 1.13)        | 1.03 (0.96; 1.10)        | 1.01 (0.94; 1.08)        | <b>0.94 (0.88; 1.01)</b> |
|                                                    | 0.96 (0.89; 1.04)        | 0.99 (0.92; 1.08)        | 0.99 (0.91; 1.08)        | 1.02 (0.95; 1.09)        | 0.98 (0.90; 1.06)        | <b>0.92 (0.88; 0.97)</b> | <b>0.95 (0.91; 1.00)</b> | 0.98 (0.93; 1.02)        | <b>0.95 (0.91; 0.99)</b> | <b>0.95 (0.91; 1.00)</b> | 0.97 (0.92; 1.03)        |
| Covid-19 anxiety                                   | <b>1.10 (1.02; 1.17)</b> | 1.05 (0.98; 1.12)        | <b>1.13 (1.04; 1.23)</b> | 1.04 (0.96; 1.12)        | 1.03 (0.95; 1.12)        | 1.01 (0.96; 1.07)        | 1.01 (0.94; 1.08)        | 1.00 (0.91; 1.10)        | 1.06 (0.98; 1.15)        | 1.01 (0.93; 1.09)        | 1.04 (0.93; 1.15)        |
|                                                    | 1.04 (0.94; 1.15)        | 0.97 (0.88; 1.06)        | 0.97 (0.88; 1.08)        | 0.96 (0.88; 1.05)        | 1.02 (0.92; 1.13)        | 1.01 (0.94; 1.10)        | 1.05 (0.98; 1.13)        | 1.00 (0.94; 1.07)        | 0.96 (0.90; 1.02)        | 1.00 (0.94; 1.07)        | <b>0.93 (0.86; 1.01)</b> |
| Closure of workplace (Affected)                    | 1.27 (0.88; 1.83)        | 1.17 (0.81; 1.70)        | <b>1.67 (1.06; 2.64)</b> | 0.98 (0.63; 1.53)        | <b>1.81 (1.14; 2.88)</b> | 1.03 (0.75; 1.41)        | 0.96 (0.66; 1.38)        | 1.26 (0.75; 2.11)        | <b>2.49 (1.60; 3.88)</b> | 1.13 (0.72; 1.78)        | 0.88 (0.50; 1.55)        |
|                                                    | 1.49 (0.87; 2.56)        | 0.86 (0.52; 1.43)        | 1.58 (0.88; 2.85)        | 0.72 (0.45; 1.14)        | 1.63 (0.91; 2.93)        | 1.08 (0.72; 1.64)        | 1.10 (0.75; 1.60)        | <b>0.66 (0.46; 0.94)</b> | 1.03 (0.75; 1.43)        | 0.90 (0.63; 1.29)        | 1.30 (0.84; 1.99)        |
| Closure of work canteens (Affected)                | 1.09 (0.67; 1.75)        | 1.22 (0.76; 1.98)        | <b>0.56 (0.29; 1.05)</b> | <b>1.77 (1.03; 3.04)</b> | 0.92 (0.50; 1.68)        | 0.86 (0.56; 1.34)        | 1.00 (0.60; 1.66)        | 1.54 (0.85; 2.80)        | <b>0.45 (0.23; 0.89)</b> | 0.73 (0.38; 1.42)        | 1.11 (0.55; 2.22)        |
|                                                    | 1.40 (0.70; 2.81)        | 0.94 (0.47; 1.88)        | 1.20 (0.60; 2.40)        | 0.87 (0.45; 1.66)        | 1.34 (0.63; 2.83)        | 1.01 (0.59; 1.73)        | 0.77 (0.46; 1.28)        | 1.03 (0.64; 1.64)        | <b>1.42 (0.95; 2.13)</b> | 1.26 (0.80; 1.97)        | 1.19 (0.71; 1.99)        |
| Closure of cafés & restaurants (Affected)          | 1.32 (0.73; 2.40)        | 1.34 (0.73; 2.47)        | 0.97 (0.43; 2.16)        | 0.50 (0.21; 1.21)        | 1.54 (0.74; 3.22)        | 1.28 (0.75; 2.19)        | 0.82 (0.40; 1.67)        | 1.11 (0.50; 2.46)        | 1.48 (0.72; 3.05)        | 1.18 (0.54; 2.60)        | <b>2.52 (1.20; 5.26)</b> |
|                                                    | 0.96 (0.37; 2.52)        | 1.06 (0.47; 2.39)        | 1.02 (0.40; 2.59)        | 1.52 (0.75; 3.05)        | <b>2.26 (0.95; 5.35)</b> | 1.20 (0.61; 2.37)        | 1.57 (0.87; 2.82)        | 1.38 (0.78; 2.43)        | 1.38 (0.81; 2.35)        | 1.56 (0.89; 2.75)        | 1.46 (0.73; 2.92)        |
| Income loss due to pandemic (Affected)             | 1.07 (0.60; 1.91)        | 0.63 (0.31; 1.26)        | 1.22 (0.61; 2.44)        | 0.99 (0.51; 1.96)        | 0.92 (0.43; 1.96)        | 1.08 (0.65; 1.80)        | 0.79 (0.41; 1.53)        | 1.41 (0.69; 2.89)        | 1.62 (0.83; 3.17)        | 1.13 (0.52; 2.49)        | 1.07 (0.45; 2.55)        |
|                                                    | 0.80 (0.33; 1.94)        | 1.51 (0.76; 3.01)        | 1.10 (0.45; 2.67)        | 0.75 (0.32; 1.72)        | 1.01 (0.44; 2.30)        | 0.78 (0.38; 1.59)        | 0.71 (0.37; 1.33)        | 0.81 (0.44; 1.48)        | <b>1.51 (0.93; 2.47)</b> | <b>1.77 (1.06; 2.94)</b> | <b>1.77 (0.98; 3.19)</b> |
| Household composition (Single person) (Adults 2+)  | <b>1.79 (1.02; 3.14)</b> | <b>2.53 (1.43; 4.47)</b> | 1.20 (0.65; 2.25)        | 1.15 (0.61; 2.16)        | 1.34 (0.68; 2.64)        | 0.87 (0.54; 1.40)        | 0.75 (0.44; 1.30)        | 1.02 (0.49; 2.10)        | 1.46 (0.74; 2.88)        | 1.10 (0.59; 2.07)        | 1.29 (0.58; 2.87)        |
|                                                    | <b>0.49 (0.23; 1.07)</b> | 1.17 (0.51; 2.65)        | 0.55 (0.25; 1.20)        | 0.73 (0.38; 1.41)        | 1.58 (0.59; 4.28)        | 1.27 (0.68; 2.37)        | 1.21 (0.71; 2.08)        | 1.41 (0.85; 2.33)        | 0.95 (0.60; 1.50)        | 0.75 (0.46; 1.24)        | <b>0.50 (0.28; 0.89)</b> |
|                                                    | 1.26 (0.73; 2.16)        | 1.33 (0.76; 2.31)        | 0.70 (0.37; 1.29)        | 0.82 (0.45; 1.51)        | 0.96 (0.50; 1.87)        | 1.03 (0.66; 1.60)        | 0.75 (0.46; 1.25)        | 1.15 (0.58; 2.26)        | 1.28 (0.66; 2.45)        | 0.62 (0.33; 1.17)        | 0.94 (0.43; 2.04)        |
|                                                    | 0.75 (0.37; 1.55)        | <b>2.02 (0.94; 4.34)</b> | <b>0.51 (0.24; 1.09)</b> | 0.85 (0.46; 1.57)        | 1.74 (0.67; 4.54)        | 1.16 (0.63; 2.10)        | 0.89 (0.52; 1.52)        | 1.15 (0.71; 1.87)        | 0.78 (0.50; 1.20)        | <b>0.54 (0.34; 0.87)</b> | <b>0.56 (0.33; 0.95)</b> |
| Gender (Female)                                    | 0.80 (0.55; 1.14)        | <b>0.71 (0.50; 1.02)</b> | <b>0.57 (0.36; 0.89)</b> | 0.77 (0.51; 1.18)        | 0.75 (0.48; 1.18)        | 0.98 (0.73; 1.33)        | 1.14 (0.80; 1.62)        | 1.41 (0.85; 2.33)        | <b>0.66 (0.43; 1.02)</b> | 0.81 (0.52; 1.25)        | 0.64 (0.37; 1.11)        |
|                                                    | <b>1.63 (0.96; 2.77)</b> | 0.82 (0.51; 1.32)        | 0.74 (0.43; 1.30)        | 1.00 (0.65; 1.55)        | 0.77 (0.44; 1.35)        | 0.86 (0.58; 1.27)        | <b>0.71 (0.49; 1.01)</b> | 0.81 (0.58; 1.13)        | <b>1.30 (0.95; 1.77)</b> | <b>1.37 (0.97; 1.94)</b> | 1.02 (0.67; 1.55)        |
| Age (19-35) (36-49) (50-65)                        | 0.88 (0.46; 1.71)        | 0.78 (0.40; 1.50)        | <b>2.42 (1.10; 5.32)</b> | 1.02 (0.49; 2.15)        | 0.66 (0.27; 1.61)        | <b>0.52 (0.30; 0.91)</b> | <b>0.33 (0.16; 0.67)</b> | 1.90 (0.80; 4.53)        | 1.46 (0.69; 3.10)        | 0.80 (0.36; 1.79)        | <b>2.35 (0.94; 5.88)</b> |
|                                                    | 1.01 (0.44; 2.29)        | 1.45 (0.65; 3.24)        | 1.25 (0.50; 3.10)        | 1.12 (0.55; 2.27)        | 0.71 (0.30; 1.65)        | 1.19 (0.62; 2.29)        | <b>2.81 (1.51; 5.25)</b> | 1.48 (0.83; 2.62)        | 1.35 (0.81; 2.27)        | 0.83 (0.47; 1.50)        | 1.14 (0.57; 2.28)        |
|                                                    | 1.40 (0.74; 2.65)        | 1.20 (0.64; 2.25)        | 1.68 (0.73; 3.87)        | 0.96 (0.43; 2.13)        | 1.24 (0.55; 2.79)        | 0.77 (0.44; 1.32)        | 0.81 (0.43; 1.53)        | 2.12 (0.85; 5.30)        | 1.77 (0.83; 3.78)        | 1.21 (0.57; 2.54)        | 1.23 (0.44; 3.47)        |
|                                                    | 0.59 (0.22; 1.56)        | 1.65 (0.68; 4.02)        | 0.70 (0.26; 1.87)        | 1.21 (0.59; 2.49)        | <b>0.25 (0.07; 0.86)</b> | 0.93 (0.44; 1.94)        | <b>2.30 (1.20; 4.40)</b> | <b>1.94 (1.09; 3.46)</b> | 1.29 (0.75; 2.23)        | 0.95 (0.51; 1.76)        | 1.33 (0.66; 2.69)        |
| (50-65)                                            | 1.27 (0.82; 1.96)        | 1.00 (0.65; 1.55)        | 1.59 (0.85; 2.97)        | 1.07 (0.63; 1.82)        | 1.35 (0.76; 2.41)        | 0.75 (0.52; 1.07)        | <b>0.69 (0.45; 1.05)</b> | 1.61 (0.79; 3.28)        | 1.04 (0.61; 1.76)        | 0.93 (0.54; 1.57)        | 1.19 (0.58; 2.44)        |
|                                                    | 0.63 (0.32; 1.22)        | 1.37 (0.75; 2.50)        | <b>0.46 (0.21; 1.02)</b> | <b>0.55 (0.32; 0.95)</b> | <b>0.53 (0.27; 1.04)</b> | 0.77 (0.47; 1.26)        | 1.41 (0.88; 2.27)        | 1.10 (0.73; 1.67)        | 0.85 (0.57; 1.25)        | 0.90 (0.58; 1.38)        | <b>0.61 (0.35; 1.09)</b> |
| Education (Lower sec.) (Upper sec.)                | 0.92 (0.55; 1.52)        | 0.98 (0.59; 1.63)        | 0.97 (0.49; 1.90)        | 0.85 (0.44; 1.64)        | 1.19 (0.61; 2.32)        | 0.92 (0.60; 1.41)        | 1.37 (0.83; 2.27)        | 0.78 (0.38; 1.63)        | 1.37 (0.74; 2.51)        | 1.49 (0.80; 2.77)        | 0.44 (0.17; 1.17)        |
|                                                    | 0.53 (0.24; 1.17)        | 0.91 (0.45; 1.81)        | 1.24 (0.55; 2.83)        | 0.85 (0.47; 1.56)        | 0.98 (0.43; 2.22)        | 0.72 (0.40; 1.29)        | 0.70 (0.41; 1.22)        | <b>0.62 (0.38; 1.02)</b> | 1.18 (0.75; 1.85)        | 0.76 (0.46; 1.27)        | 0.63 (0.33; 1.21)        |
|                                                    | 0.81 (0.54; 1.22)        | 0.94 (0.62; 1.42)        | 0.96 (0.58; 1.58)        | 1.25 (0.77; 2.01)        | 1.12 (0.66; 1.90)        | 0.96 (0.68; 1.36)        | 1.19 (0.78; 1.79)        | 0.73 (0.42; 1.27)        | 1.04 (0.63; 1.73)        | 1.18 (0.70; 1.99)        | 1.16 (0.64; 2.09)        |
| Eating frequency before pandemic                   | 0.96 (0.89; 1.04)        | <b>1.17 (1.07; 1.28)</b> | <b>0.76 (0.69; 0.84)</b> | <b>1.79 (1.56; 2.05)</b> | <b>0.80 (0.73; 0.88)</b> | <b>1.19 (1.10; 1.30)</b> | <b>1.40 (1.25; 1.58)</b> | <b>2.14 (1.79; 2.54)</b> | <b>1.24 (1.13; 1.37)</b> | 1.02 (0.92; 1.13)        | 1.05 (0.93; 1.19)        |
|                                                    | <b>0.54 (0.47; 0.62)</b> | <b>0.65 (0.57; 0.75)</b> | <b>0.49 (0.43; 0.55)</b> | 0.90 (0.70; 1.15)        | <b>0.55 (0.48; 0.62)</b> | <b>0.70 (0.60; 0.83)</b> | <b>0.57 (0.45; 0.72)</b> | 1.07 (0.88; 1.31)        | <b>0.85 (0.77; 0.94)</b> | <b>0.81 (0.73; 0.90)</b> | <b>0.88 (0.79; 0.99)</b> |

Notes: (1) grey coloured rows: outcome change “decrease of consumption frequency”, white coloured rows: outcome change “increase of consumption frequency”. In bold: significant coefficient (p<0.1). (2) MNL regression variables base categories: “no change” for outcome variable consumption frequency, category “not affected” for the variables “closure of physical workplace”, “closure of work canteens”, “closure of cafés and restaurants”, “income loss due to pandemic”; level “with children” for household composition; level “male” for gender; level “university degree” for education; level “66+” for age; (3) variables “eating frequency before pandemic”, “food shopping frequency”, “covid-19 anxiety” are continuous predictors.

**Table S3:** Multinomial logistic regression models on changes in food consumption frequencies – Germany

| Predictor variables                       | Model 1                                            | Model 2                  | Model 3                  | Model 4                  | Model 5                  | Model 6                  | Model 7                  | Model 8                  | Model 9                  | Model 10                 | Model 11                 |
|-------------------------------------------|----------------------------------------------------|--------------------------|--------------------------|--------------------------|--------------------------|--------------------------|--------------------------|--------------------------|--------------------------|--------------------------|--------------------------|
|                                           | Fresh fruit & vegetables                           | Fresh meat               | Fresh fish               | Bread                    | Dairy products           | Frozen food              | Canned food              | Ready-made meals         | Cake & biscuits          | Sweets & chocolate       | Alcoholic drinks         |
|                                           | Odds ratios (in brackets: 95% confidence interval) |                          |                          |                          |                          |                          |                          |                          |                          |                          |                          |
| Food shopping frequency                   | <b>0.88 (0.82; 0.94)</b>                           | <b>0.91 (0.86; 0.97)</b> | 0.97 (0.90; 1.04)        | <b>0.86 (0.80; 0.93)</b> | 1.00 (0.93; 1.08)        | 1.04 (0.97; 1.12)        | 1.06 (0.97; 1.16)        | 1.06 (0.96; 1.16)        | <b>0.93 (0.86; 1.00)</b> | 1.04 (0.96; 1.13)        | 0.96 (0.88; 1.05)        |
|                                           | 0.95 (0.85; 1.05)                                  | 1.07 (0.94; 1.20)        | <b>0.88 (0.80; 0.96)</b> | 0.95 (0.86; 1.06)        | 0.94 (0.85; 1.03)        | <b>0.92 (0.86; 0.98)</b> | <b>0.91 (0.86; 0.97)</b> | 0.97 (0.91; 1.03)        | <b>0.89 (0.83; 0.95)</b> | <b>0.94 (0.88; 1.00)</b> | <b>0.94 (0.88; 1.00)</b> |
| Covid-19 anxiety                          | 1.00 (0.93; 1.08)                                  | 0.98 (0.91; 1.05)        | 1.00 (0.92; 1.08)        | 1.06 (0.97; 1.16)        | 0.99 (0.92; 1.07)        | 0.98 (0.91; 1.04)        | 1.00 (0.92; 1.08)        | 0.97 (0.88; 1.07)        | 1.04 (0.96; 1.13)        | 1.04 (0.96; 1.12)        | 0.96 (0.87; 1.05)        |
|                                           | <b>0.91 (0.83; 1.00)</b>                           | 0.99 (0.90; 1.09)        | 1.01 (0.90; 1.12)        | 1.01 (0.91; 1.11)        | 1.02 (0.93; 1.13)        | 0.98 (0.91; 1.05)        | 1.03 (0.96; 1.10)        | 1.05 (0.98; 1.12)        | 1.04 (0.97; 1.11)        | 1.05 (0.98; 1.13)        | 1.03 (0.95; 1.11)        |
| Closure of workplace (Affected)           | 0.93 (0.61; 1.43)                                  | 0.80 (0.53; 1.22)        | <b>1.54 (0.98; 2.41)</b> | <b>1.56 (0.95; 2.56)</b> | 1.22 (0.79; 1.87)        | 1.00 (0.67; 1.50)        | 0.94 (0.56; 1.59)        | 1.34 (0.78; 2.33)        | 1.42 (0.92; 2.19)        | 1.35 (0.85; 2.14)        | 1.07 (0.61; 1.87)        |
|                                           | 1.28 (0.73; 2.23)                                  | 1.05 (0.60; 1.85)        | 1.25 (0.68; 2.32)        | 1.34 (0.76; 2.35)        | 1.21 (0.69; 2.12)        | 1.04 (0.69; 1.56)        | 0.86 (0.58; 1.26)        | 0.82 (0.55; 1.22)        | <b>1.62 (1.10; 2.39)</b> | 1.13 (0.74; 1.71)        | <b>1.53 (0.99; 2.35)</b> |
| Closure of work canteens (Affected)       | 1.43 (0.85; 2.39)                                  | <b>1.84 (1.12; 3.03)</b> | 1.17 (0.67; 2.05)        | 1.24 (0.67; 2.31)        | 1.05 (0.62; 1.81)        | 0.96 (0.57; 1.64)        | 0.91 (0.46; 1.80)        | 0.90 (0.45; 1.81)        | 1.18 (0.69; 2.04)        | <b>1.68 (0.96; 2.92)</b> | 0.88 (0.43; 1.82)        |
|                                           | 1.24 (0.63; 2.47)                                  | <b>2.53 (1.34; 4.80)</b> | 1.42 (0.65; 3.10)        | <b>2.09 (1.09; 3.99)</b> | 1.41 (0.73; 2.73)        | <b>1.65 (1.01; 2.69)</b> | 1.12 (0.69; 1.81)        | 1.22 (0.75; 1.99)        | 1.16 (0.71; 1.90)        | <b>2.14 (1.30; 3.52)</b> | <b>2.14 (1.31; 3.50)</b> |
| Closure of cafés & restaurants (Affected) | 1.12 (0.72; 1.74)                                  | 1.26 (0.83; 1.89)        | 1.31 (0.81; 2.10)        | <b>1.56 (0.95; 2.56)</b> | <b>1.56 (1.01; 2.43)</b> | 1.04 (0.68; 1.59)        | 1.49 (0.87; 2.57)        | 0.96 (0.52; 1.77)        | 0.84 (0.51; 1.38)        | 1.17 (0.72; 1.90)        | 1.48 (0.84; 2.60)        |
|                                           | 1.57 (0.87; 2.84)                                  | 0.97 (0.52; 1.81)        | 0.76 (0.38; 1.52)        | 0.96 (0.52; 1.78)        | 1.46 (0.82; 2.59)        | 1.28 (0.83; 1.96)        | <b>1.97 (1.34; 2.90)</b> | <b>1.75 (1.18; 2.59)</b> | <b>1.71 (1.15; 2.54)</b> | 1.17 (0.75; 1.83)        | 1.34 (0.85; 2.12)        |
| Income loss due to pandemic (Affected)    | 1.08 (0.70; 1.67)                                  | 1.20 (0.79; 1.83)        | 0.91 (0.56; 1.47)        | 1.40 (0.86; 2.29)        | 1.21 (0.77; 1.88)        | 0.99 (0.65; 1.52)        | 0.79 (0.44; 1.43)        | 1.01 (0.55; 1.84)        | 1.11 (0.71; 1.75)        | 1.11 (0.68; 1.81)        | 0.66 (0.35; 1.24)        |
|                                           | 0.85 (0.46; 1.56)                                  | 1.39 (0.77; 2.52)        | 0.68 (0.34; 1.33)        | 0.64 (0.33; 1.24)        | 1.12 (0.62; 2.02)        | <b>1.48 (0.98; 2.24)</b> | 1.36 (0.92; 2.00)        | <b>1.57 (1.06; 2.32)</b> | 0.90 (0.59; 1.36)        | 0.90 (0.58; 1.39)        | 1.09 (0.70; 1.71)        |
| Household composition (Single person)     | 1.57 (0.92; 2.69)                                  | 1.09 (0.67; 1.79)        | 0.84 (0.47; 1.50)        | 0.87 (0.47; 1.61)        | 1.02 (0.59; 1.77)        | 0.81 (0.49; 1.33)        | <b>0.54 (0.27; 1.08)</b> | 0.97 (0.46; 2.03)        | 0.68 (0.39; 1.19)        | 1.23 (0.68; 2.22)        | 0.67 (0.34; 1.31)        |
|                                           | <b>0.55 (0.28; 1.10)</b>                           | 0.90 (0.42; 1.91)        | 0.84 (0.37; 1.90)        | <b>0.43 (0.21; 0.89)</b> | 0.96 (0.47; 1.95)        | 0.98 (0.59; 1.63)        | 0.94 (0.58; 1.52)        | 0.99 (0.61; 1.60)        | <b>0.59 (0.36; 0.98)</b> | 0.77 (0.46; 1.30)        | 0.80 (0.46; 1.40)        |
| (Adults 2+)                               | 1.49 (0.90; 2.48)                                  | 0.99 (0.63; 1.56)        | 0.95 (0.57; 1.58)        | 0.98 (0.56; 1.71)        | 1.15 (0.69; 1.90)        | 1.12 (0.71; 1.76)        | 1.23 (0.69; 2.21)        | <b>1.77 (0.91; 3.44)</b> | 0.98 (0.60; 1.62)        | 1.26 (0.73; 2.20)        | 0.75 (0.41; 1.39)        |
|                                           | <b>0.52 (0.27; 0.98)</b>                           | 1.09 (0.55; 2.16)        | 0.98 (0.45; 2.11)        | <b>0.50 (0.27; 0.95)</b> | 1.02 (0.51; 2.00)        | 1.18 (0.74; 1.88)        | 1.14 (0.73; 1.77)        | 0.95 (0.61; 1.49)        | 0.92 (0.59; 1.43)        | 0.93 (0.58; 1.50)        | 1.07 (0.66; 1.75)        |
| Gender (Female)                           | 1.02 (0.68; 1.53)                                  | 1.05 (0.72; 1.55)        | <b>1.58 (0.98; 2.53)</b> | 1.30 (0.81; 2.10)        | <b>0.70 (0.46; 1.06)</b> | 1.04 (0.72; 1.49)        | 0.72 (0.45; 1.16)        | 1.16 (0.67; 2.00)        | 0.70 (0.46; 1.08)        | 0.89 (0.57; 1.39)        | 0.94 (0.54; 1.63)        |
|                                           | <b>1.76 (1.04; 2.96)</b>                           | 0.88 (0.51; 1.51)        | 0.68 (0.38; 1.20)        | 0.83 (0.48; 1.45)        | 0.77 (0.46; 1.31)        | 1.00 (0.68; 1.49)        | 0.95 (0.66; 1.36)        | 0.95 (0.65; 1.37)        | 1.10 (0.75; 1.61)        | 0.94 (0.63; 1.41)        | 1.12 (0.71; 1.76)        |
| Age (19-35)                               | 1.53 (0.76; 3.11)                                  | 0.90 (0.48; 1.66)        | <b>2.68 (1.11; 6.46)</b> | 0.66 (0.28; 1.53)        | 1.68 (0.79; 3.58)        | 0.82 (0.45; 1.49)        | 0.66 (0.31; 1.41)        | <b>2.28 (0.97; 5.38)</b> | <b>1.89 (0.94; 3.78)</b> | 1.43 (0.69; 2.95)        | <b>2.78 (1.09; 7.10)</b> |
|                                           | 0.61 (0.27; 1.38)                                  | 0.60 (0.26; 1.37)        | 0.58 (0.21; 1.58)        | 0.73 (0.31; 1.72)        | 0.64 (0.28; 1.46)        | 1.28 (0.67; 2.44)        | 0.90 (0.48; 1.68)        | 1.01 (0.55; 1.85)        | 1.17 (0.64; 2.13)        | <b>1.89 (0.98; 3.64)</b> | <b>3.23 (1.40; 7.41)</b> |
| (36-49)                                   | 1.69 (0.87; 3.28)                                  | 0.90 (0.50; 1.61)        | <b>2.57 (1.08; 6.08)</b> | 1.55 (0.72; 3.33)        | 1.19 (0.58; 2.48)        | 0.71 (0.40; 1.24)        | <b>0.36 (0.17; 0.78)</b> | 0.74 (0.30; 1.84)        | 1.03 (0.53; 2.01)        | 0.93 (0.46; 1.86)        | 1.93 (0.79; 4.70)        |
|                                           | <b>0.31 (0.13; 0.70)</b>                           | <b>0.47 (0.22; 1.04)</b> | 1.20 (0.49; 2.95)        | <b>0.31 (0.12; 0.78)</b> | 0.66 (0.30; 1.45)        | 1.23 (0.67; 2.28)        | 1.26 (0.72; 2.23)        | 0.80 (0.45; 1.41)        | 0.65 (0.36; 1.18)        | 1.22 (0.65; 2.32)        | 1.91 (0.83; 4.39)        |
| (50-65)                                   | 1.54 (0.84; 2.84)                                  | <b>0.62 (0.36; 1.05)</b> | 1.78 (0.78; 4.05)        | 1.41 (0.70; 2.82)        | <b>1.77 (0.93; 3.35)</b> | 0.83 (0.51; 1.35)        | 0.81 (0.45; 1.48)        | 1.08 (0.49; 2.38)        | 0.88 (0.48; 1.60)        | 0.90 (0.49; 1.67)        | 1.17 (0.51; 2.71)        |
|                                           | <b>0.40 (0.20; 0.82)</b>                           | <b>0.41 (0.21; 0.83)</b> | 0.70 (0.29; 1.70)        | 0.61 (0.29; 1.25)        | <b>0.50 (0.24; 1.06)</b> | 0.82 (0.47; 1.43)        | 0.95 (0.57; 1.60)        | 0.78 (0.47; 1.29)        | 0.72 (0.43; 1.21)        | 0.99 (0.55; 1.75)        | 1.75 (0.81; 3.81)        |
| Education (Lower sec.)                    | 1.36 (0.71; 2.62)                                  | 0.89 (0.46; 1.74)        | 1.50 (0.69; 3.29)        | 1.00 (0.46; 2.17)        | 0.96 (0.45; 2.04)        | 0.88 (0.48; 1.59)        | 0.69 (0.32; 1.49)        | 1.02 (0.42; 2.50)        | 0.81 (0.41; 1.62)        | 1.57 (0.79; 3.10)        | 0.86 (0.34; 2.21)        |
|                                           | 1.33 (0.59; 2.98)                                  | 1.30 (0.58; 2.95)        | 1.62 (0.61; 4.32)        | 0.69 (0.27; 1.79)        | <b>2.13 (0.97; 4.70)</b> | 0.80 (0.40; 1.62)        | 1.00 (0.54; 1.85)        | 1.32 (0.74; 2.36)        | 0.92 (0.50; 1.71)        | 1.00 (0.51; 1.95)        | 1.17 (0.54; 2.53)        |
| (Upper sec.)                              | 1.16 (0.78; 1.75)                                  | 1.19 (0.81; 1.74)        | 1.21 (0.77; 1.91)        | 1.12 (0.69; 1.81)        | 1.36 (0.90; 2.07)        | 1.10 (0.76; 1.59)        | 0.97 (0.60; 1.56)        | 0.83 (0.49; 1.40)        | <b>0.68 (0.45; 1.02)</b> | 1.08 (0.69; 1.69)        | 0.84 (0.50; 1.42)        |
|                                           | 0.93 (0.54; 1.62)                                  | 1.19 (0.69; 2.04)        | 1.06 (0.58; 1.95)        | 0.89 (0.53; 1.52)        | 1.04 (0.60; 1.81)        | <b>1.44 (0.97; 2.13)</b> | 1.15 (0.80; 1.65)        | 1.08 (0.74; 1.56)        | 0.96 (0.66; 1.40)        | 1.10 (0.74; 1.65)        | 1.22 (0.79; 1.88)        |
| Eating frequency before pandemic          | 0.95 (0.87; 1.04)                                  | <b>1.28 (1.16; 1.42)</b> | <b>0.86 (0.79; 0.94)</b> | <b>2.62 (2.07; 3.31)</b> | 0.96 (0.88; 1.04)        | <b>1.45 (1.28; 1.64)</b> | <b>1.81 (1.52; 2.16)</b> | <b>2.14 (1.76; 2.61)</b> | <b>1.15 (1.05; 1.26)</b> | 1.02 (0.94; 1.12)        | 1.10 (0.98; 1.23)        |
|                                           | <b>0.56 (0.49; 0.63)</b>                           | <b>0.80 (0.65; 0.97)</b> | <b>0.54 (0.48; 0.62)</b> | 1.07 (0.74; 1.54)        | <b>0.57 (0.51; 0.65)</b> | <b>0.48 (0.38; 0.60)</b> | <b>0.55 (0.43; 0.70)</b> | <b>0.77 (0.60; 0.99)</b> | <b>0.76 (0.68; 0.86)</b> | <b>0.71 (0.64; 0.79)</b> | 0.92 (0.82; 1.03)        |

**Notes:** (1) grey coloured rows: outcome change "decrease of consumption frequency", white coloured rows: outcome change "increase of consumption frequency". In **bold**: significant coefficient (p<0.1). (2) MNL regression variables base categories: "no change" for outcome variable consumption frequency, category "not affected" for the variables "closure of physical workplace", "closure of work canteens", "closure of cafés and restaurants", "income loss due to pandemic"; level "with children" for household composition; level "male" for gender; level "university degree" for education; level "66+" for age; (3) variables "eating frequency before pandemic", "food shopping frequency", "covid-19 anxiety" are continuous predictors.

**Table S4:** Multinomial logistic regression models on changes in food consumption frequencies – Slovenia

| Predictor variables                                | Model 1                   | Model 2                  | Model 3                   | Model 4                  | Model 5                  | Model 6                  | Model 7                  | Model 8                  | Model 9                   | Model 10                 | Model 11                 |
|----------------------------------------------------|---------------------------|--------------------------|---------------------------|--------------------------|--------------------------|--------------------------|--------------------------|--------------------------|---------------------------|--------------------------|--------------------------|
|                                                    | Fresh fruit & vegetables  | Fresh meat               | Fresh fish                | Bread                    | Dairy products           | Frozen food              | Canned food              | Ready-made meals         | Cake & biscuits           | Sweets & chocolate       | Alcoholic drinks         |
| Odds ratios (in brackets: 95% confidence interval) |                           |                          |                           |                          |                          |                          |                          |                          |                           |                          |                          |
| Food shopping frequency                            | <b>0.96 (0.92; 1.01)</b>  | 1.01 (0.96; 1.06)        | <b>0.94 (0.90; 0.99)</b>  | 0.98 (0.94; 1.03)        | <b>0.96 (0.91; 1.01)</b> | 1.00 (0.95; 1.05)        | 0.99 (0.94; 1.04)        | 1.03 (0.97; 1.09)        | 0.99 (0.94; 1.04)         | 0.98 (0.93; 1.03)        | 1.01 (0.95; 1.07)        |
|                                                    | 0.97 (0.91; 1.03)         | <b>1.07 (0.99; 1.16)</b> | 0.95 (0.86; 1.04)         | 1.01 (0.94; 1.08)        | <b>1.07 (0.99; 1.15)</b> | 0.97 (0.92; 1.02)        | 0.97 (0.93; 1.02)        | 0.97 (0.91; 1.02)        | 0.98 (0.93; 1.03)         | <b>0.95 (0.90; 1.00)</b> | 0.96 (0.91; 1.02)        |
| Covid-19 anxiety                                   | 1.05 (0.98; 1.14)         | <b>1.07 (0.99; 1.16)</b> | 0.99 (0.91; 1.07)         | 1.04 (0.96; 1.13)        | 1.04 (0.95; 1.13)        | 1.04 (0.96; 1.13)        | 1.06 (0.97; 1.14)        | 1.05 (0.96; 1.14)        | 0.98 (0.91; 1.06)         | 1.05 (0.97; 1.14)        | 1.03 (0.94; 1.12)        |
|                                                    | 0.99 (0.88; 1.10)         | 1.03 (0.91; 1.16)        | <b>0.85 (0.74; 0.97)</b>  | 0.99 (0.89; 1.11)        | 1.06 (0.95; 1.18)        | 1.01 (0.93; 1.10)        | 1.04 (0.96; 1.13)        | 0.99 (0.90; 1.09)        | 1.00 (0.92; 1.09)         | 1.03 (0.95; 1.12)        | 1.01 (0.92; 1.11)        |
| Closure of workplace (Affected)                    | 1.04 (0.65; 1.67)         | 1.26 (0.76; 2.07)        | 1.05 (0.65; 1.71)         | 1.07 (0.65; 1.77)        | 0.72 (0.43; 1.19)        | <b>0.64 (0.40; 1.02)</b> | <b>0.65 (0.41; 1.04)</b> | <b>1.71 (0.97; 3.03)</b> | 1.08 (0.67; 1.74)         | 1.04 (0.64; 1.70)        | 1.53 (0.85; 2.75)        |
|                                                    | 0.69 (0.37; 1.27)         | 1.25 (0.61; 2.57)        | 0.57 (0.26; 1.25)         | 1.02 (0.53; 1.97)        | 1.36 (0.71; 2.59)        | 1.05 (0.64; 1.74)        | 0.75 (0.46; 1.23)        | 1.10 (0.62; 1.96)        | 1.07 (0.65; 1.75)         | 1.00 (0.60; 1.66)        | 1.03 (0.57; 1.84)        |
| Closure of work canteens (Affected)                | 1.07 (0.62; 1.84)         | 1.11 (0.61; 2.02)        | 1.52 (0.87; 2.67)         | 1.00 (0.54; 1.86)        | 1.21 (0.63; 2.31)        | 0.98 (0.54; 1.81)        | 0.69 (0.37; 1.32)        | 1.25 (0.69; 2.26)        | 1.29 (0.73; 2.29)         | 1.14 (0.62; 2.08)        | <b>2.30 (1.24; 4.27)</b> |
|                                                    | 1.35 (0.60; 3.01)         | 1.20 (0.55; 2.61)        | 2.05 (0.79; 5.32)         | 1.07 (0.50; 2.32)        | 1.40 (0.64; 3.07)        | 0.68 (0.36; 1.28)        | 0.93 (0.51; 1.69)        | 0.73 (0.34; 1.57)        | 1.41 (0.79; 2.52)         | <b>1.67 (0.93; 2.99)</b> | 1.51 (0.77; 2.95)        |
| Closure of cafés & restaurants (Affected)          | 1.46 (0.87; 2.44)         | <b>1.79 (1.03; 3.11)</b> | 0.78 (0.45; 1.36)         | 1.39 (0.78; 2.45)        | 0.87 (0.46; 1.66)        | 0.86 (0.47; 1.56)        | 0.74 (0.40; 1.35)        | 1.40 (0.78; 2.51)        | 1.17 (0.67; 2.02)         | 1.18 (0.67; 2.07)        | 0.68 (0.35; 1.31)        |
|                                                    | 1.28 (0.60; 2.75)         | 1.50 (0.71; 3.15)        | 1.45 (0.60; 3.49)         | 0.77 (0.35; 1.67)        | 1.12 (0.54; 2.33)        | <b>1.84 (1.05; 3.20)</b> | 1.48 (0.86; 2.55)        | <b>2.36 (1.26; 4.40)</b> | 1.43 (0.82; 2.47)         | 1.57 (0.89; 2.74)        | 1.37 (0.73; 2.57)        |
| Income loss due to pandemic (Affected)             | <b>1.74 (1.13; 2.68)</b>  | 1.18 (0.76; 1.83)        | 1.12 (0.72; 1.73)         | 1.39 (0.87; 2.20)        | 0.92 (0.57; 1.51)        | 1.04 (0.67; 1.63)        | 1.37 (0.88; 2.15)        | <b>1.56 (0.95; 2.55)</b> | 1.11 (0.72; 1.72)         | 1.12 (0.72; 1.76)        | <b>1.67 (1.00; 2.78)</b> |
|                                                    | 1.06 (0.59; 1.90)         | 0.95 (0.50; 1.83)        | <b>5.17 (2.17; 12.31)</b> | 1.05 (0.57; 1.93)        | 0.99 (0.56; 1.75)        | 1.42 (0.90; 2.25)        | 1.05 (0.67; 1.66)        | 0.86 (0.50; 1.47)        | 1.20 (0.76; 1.90)         | 0.87 (0.55; 1.38)        | 1.57 (0.91; 2.71)        |
| Household composition (Single person)              | 0.74 (0.31; 1.78)         | 1.61 (0.72; 3.61)        | 1.50 (0.65; 3.48)         | 0.69 (0.24; 2.01)        | 0.77 (0.29; 2.07)        | 0.70 (0.30; 1.62)        | 0.95 (0.40; 2.25)        | <b>0.27 (0.08; 0.92)</b> | 1.14 (0.52; 2.52)         | 1.28 (0.55; 2.99)        | 0.80 (0.28; 2.33)        |
|                                                    | 1.33 (0.45; 3.93)         | <b>0.22 (0.05; 1.07)</b> | 0.82 (0.19; 3.49)         | 0.92 (0.31; 2.74)        | 1.17 (0.42; 3.23)        | 0.76 (0.30; 1.92)        | 1.60 (0.70; 3.64)        | 1.66 (0.65; 4.22)        | 1.03 (0.43; 2.48)         | 1.30 (0.54; 3.15)        | 0.46 (0.10; 2.10)        |
|                                                    | 0.97 (0.62; 1.52)         | 1.02 (0.63; 1.67)        | 1.48 (0.92; 2.39)         | <b>1.52 (0.93; 2.49)</b> | 0.87 (0.52; 1.48)        | 0.80 (0.49; 1.29)        | 0.97 (0.60; 1.57)        | 0.87 (0.53; 1.45)        | 0.84 (0.52; 1.34)         | 1.25 (0.77; 2.03)        | 1.39 (0.81; 2.38)        |
| (Adults 2+)                                        | 1.36 (0.72; 2.57)         | <b>0.55 (0.28; 1.09)</b> | 0.96 (0.42; 2.17)         | 0.78 (0.40; 1.48)        | 1.06 (0.56; 2.01)        | 1.22 (0.75; 1.99)        | 1.27 (0.77; 2.07)        | 1.48 (0.82; 2.67)        | 0.98 (0.60; 1.59)         | <b>1.56 (0.94; 2.58)</b> | <b>2.12 (1.20; 3.77)</b> |
|                                                    | 0.93 (0.62; 1.42)         | <b>1.92 (1.24; 2.97)</b> | <b>1.91 (1.24; 2.94)</b>  | <b>1.85 (1.17; 2.91)</b> | 1.26 (0.79; 2.02)        | 1.23 (0.80; 1.89)        | 1.06 (0.69; 1.63)        | 0.77 (0.48; 1.24)        | 1.26 (0.82; 1.91)         | 1.20 (0.78; 1.86)        | 0.91 (0.54; 1.51)        |
| Gender (Female)                                    | <b>2.02 (1.12; 3.64)</b>  | 1.47 (0.77; 2.81)        | <b>1.98 (0.92; 4.24)</b>  | 1.07 (0.58; 1.95)        | 1.54 (0.88; 2.69)        | 1.23 (0.79; 1.93)        | <b>1.55 (0.99; 2.44)</b> | 0.69 (0.41; 1.18)        | 1.21 (0.77; 1.89)         | 1.37 (0.87; 2.16)        | 1.07 (0.62; 1.85)        |
|                                                    | <b>3.06 (0.84; 11.08)</b> | 0.56 (0.22; 1.46)        | 2.89 (0.79; 10.65)        | 0.99 (0.35; 2.82)        | 0.92 (0.27; 3.10)        | <b>0.34 (0.13; 0.87)</b> | 0.65 (0.25; 1.70)        | 0.83 (0.29; 2.42)        | 0.77 (0.31; 1.94)         | 1.04 (0.38; 2.82)        | 0.71 (0.25; 1.98)        |
| Age (19-35)                                        | 2.18 (0.41; 11.62)        | 4.01 (0.48; 33.87)       | 1.01 (0.08; 12.86)        | 5.66 (0.69; 46.35)       | 0.74 (0.19; 2.85)        | 1.35 (0.43; 4.25)        | 2.01 (0.60; 6.68)        | 3.69 (0.76; 17.80)       | <b>7.45 (0.94; 58.94)</b> | 1.99 (0.60; 6.58)        | 4.40 (0.55; 35.56)       |
|                                                    | 2.29 (0.64; 8.21)         | 0.51 (0.20; 1.30)        | <b>3.59 (1.00; 12.90)</b> | 1.09 (0.39; 3.01)        | 1.51 (0.47; 4.91)        | <b>0.46 (0.19; 1.13)</b> | 0.87 (0.35; 2.17)        | 0.71 (0.25; 2.03)        | 0.70 (0.29; 1.72)         | 0.85 (0.32; 2.28)        | 0.67 (0.24; 1.81)        |
|                                                    | 1.19 (0.22; 6.31)         | 1.58 (0.18; 13.64)       | 0.74 (0.06; 9.64)         | 3.21 (0.39; 26.26)       | 0.94 (0.25; 3.49)        | 1.11 (0.36; 3.43)        | 1.95 (0.59; 6.39)        | 3.12 (0.66; 14.82)       | <b>7.64 (0.98; 59.74)</b> | 1.91 (0.59; 6.21)        | 4.16 (0.52; 33.37)       |
| (36-49)                                            | 2.64 (0.75; 9.28)         | 0.74 (0.31; 1.78)        | 1.74 (0.49; 6.20)         | 0.85 (0.32; 2.29)        | 1.24 (0.39; 3.92)        | <b>0.42 (0.18; 1.00)</b> | 0.68 (0.28; 1.64)        | 0.62 (0.22; 1.72)        | 0.68 (0.29; 1.60)         | 0.87 (0.34; 2.24)        | 0.59 (0.22; 1.56)        |
|                                                    | 2.69 (0.53; 13.61)        | 1.99 (0.24; 16.49)       | 1.16 (0.09; 14.18)        | 2.13 (0.26; 17.43)       | 1.32 (0.37; 4.72)        | 1.05 (0.35; 3.12)        | 1.35 (0.42; 4.31)        | 2.37 (0.52; 10.91)       | <b>5.47 (0.70; 42.59)</b> | 1.59 (0.50; 5.05)        | 3.46 (0.44; 27.29)       |
| Education (Lower sec.)                             | 1.61 (0.56; 4.63)         | 0.23 (0.03; 1.82)        | 1.49 (0.52; 4.24)         | 0.72 (0.19; 2.76)        | 1.99 (0.65; 6.11)        | <b>2.43 (0.87; 6.76)</b> | 1.29 (0.41; 4.03)        | 1.18 (0.34; 4.06)        | 1.53 (0.53; 4.43)         | 1.37 (0.49; 3.87)        | 1.22 (0.37; 4.00)        |
|                                                    | 1.42 (0.35; 5.76)         | 2.23 (0.58; 8.50)        | <b>4.71 (0.88; 25.12)</b> | 0.84 (0.17; 4.12)        | 0.96 (0.23; 4.01)        | 1.02 (0.26; 3.94)        | <b>2.47 (0.87; 7.04)</b> | 1.46 (0.37; 5.70)        | 1.55 (0.50; 4.79)         | 0.50 (0.11; 2.35)        | 0.71 (0.15; 3.43)        |
|                                                    | 1.27 (0.82; 1.99)         | 1.02 (0.65; 1.61)        | 0.90 (0.57; 1.40)         | 1.41 (0.87; 2.27)        | 1.30 (0.77; 2.19)        | <b>1.70 (1.05; 2.76)</b> | 1.17 (0.74; 1.87)        | 1.51 (0.91; 2.51)        | 1.06 (0.68; 1.66)         | 1.06 (0.67; 1.69)        | 0.95 (0.57; 1.59)        |
| (Upper sec.)                                       | 1.23 (0.65; 2.30)         | 1.61 (0.80; 3.25)        | 1.11 (0.50; 2.48)         | 1.18 (0.62; 2.23)        | <b>0.62 (0.35; 1.10)</b> | 1.19 (0.75; 1.90)        | 1.14 (0.71; 1.83)        | <b>1.89 (1.05; 3.43)</b> | 1.29 (0.80; 2.08)         | 1.36 (0.84; 2.22)        | 1.29 (0.73; 2.27)        |
|                                                    | 0.99 (0.88; 1.11)         | <b>1.18 (1.06; 1.32)</b> | 0.94 (0.86; 1.03)         | <b>2.17 (1.69; 2.78)</b> | 0.94 (0.85; 1.03)        | <b>1.45 (1.26; 1.67)</b> | <b>1.18 (1.03; 1.35)</b> | <b>2.16 (1.72; 2.72)</b> | <b>1.30 (1.17; 1.46)</b>  | <b>1.19 (1.08; 1.32)</b> | <b>1.17 (1.04; 1.32)</b> |
| Eating frequency before pandemic                   | <b>0.54 (0.46; 0.63)</b>  | <b>0.70 (0.58; 0.85)</b> | <b>0.54 (0.45; 0.64)</b>  | 0.92 (0.57; 1.49)        | <b>0.61 (0.54; 0.70)</b> | <b>0.62 (0.48; 0.80)</b> | <b>0.73 (0.59; 0.89)</b> | 0.86 (0.58; 1.30)        | <b>0.83 (0.69; 0.99)</b>  | <b>0.85 (0.74; 0.98)</b> | 0.92 (0.78; 1.09)        |

Notes: (1) grey coloured rows: outcome change "decrease of consumption frequency", white coloured rows: outcome change "increase of consumption frequency". In bold: significant coefficient (p<0.1). (2) MNL regression variables base categories: "no change" for outcome variable consumption frequency, category "not affected" for the variables "closure of physical workplace", "closure of work canteens", "closure of cafés and restaurants", "income loss due to pandemic"; level "with children" for household composition; level "male" for gender; level "university degree" for education; level "66+" for age; (3) variables "eating frequency before pandemic", "food shopping frequency", "covid-19 anxiety" are continuous predictors.

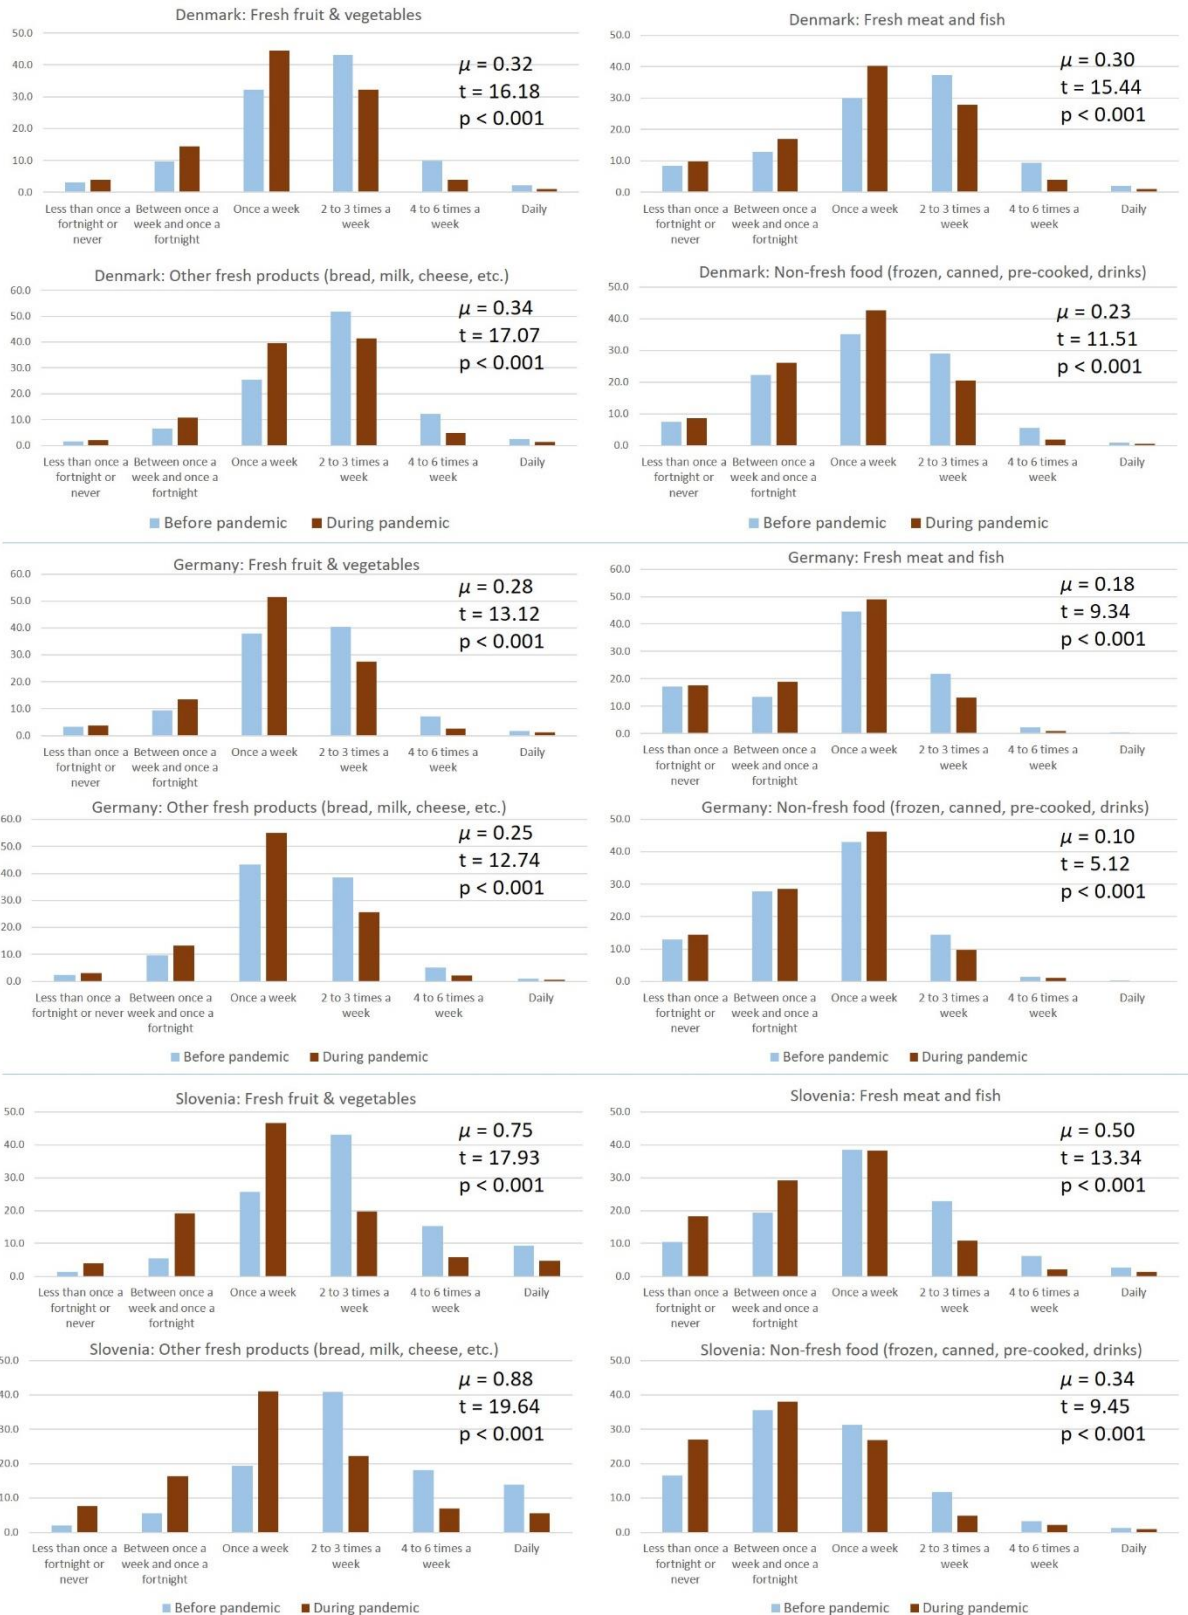

Figure S1: Shopping frequencies before and during the COVID-19 pandemic

Notes: Comparisons of mean shopping frequencies before and during the pandemic are based on paired-samples t-tests. The letter  $\mu$  refers to the mean difference.

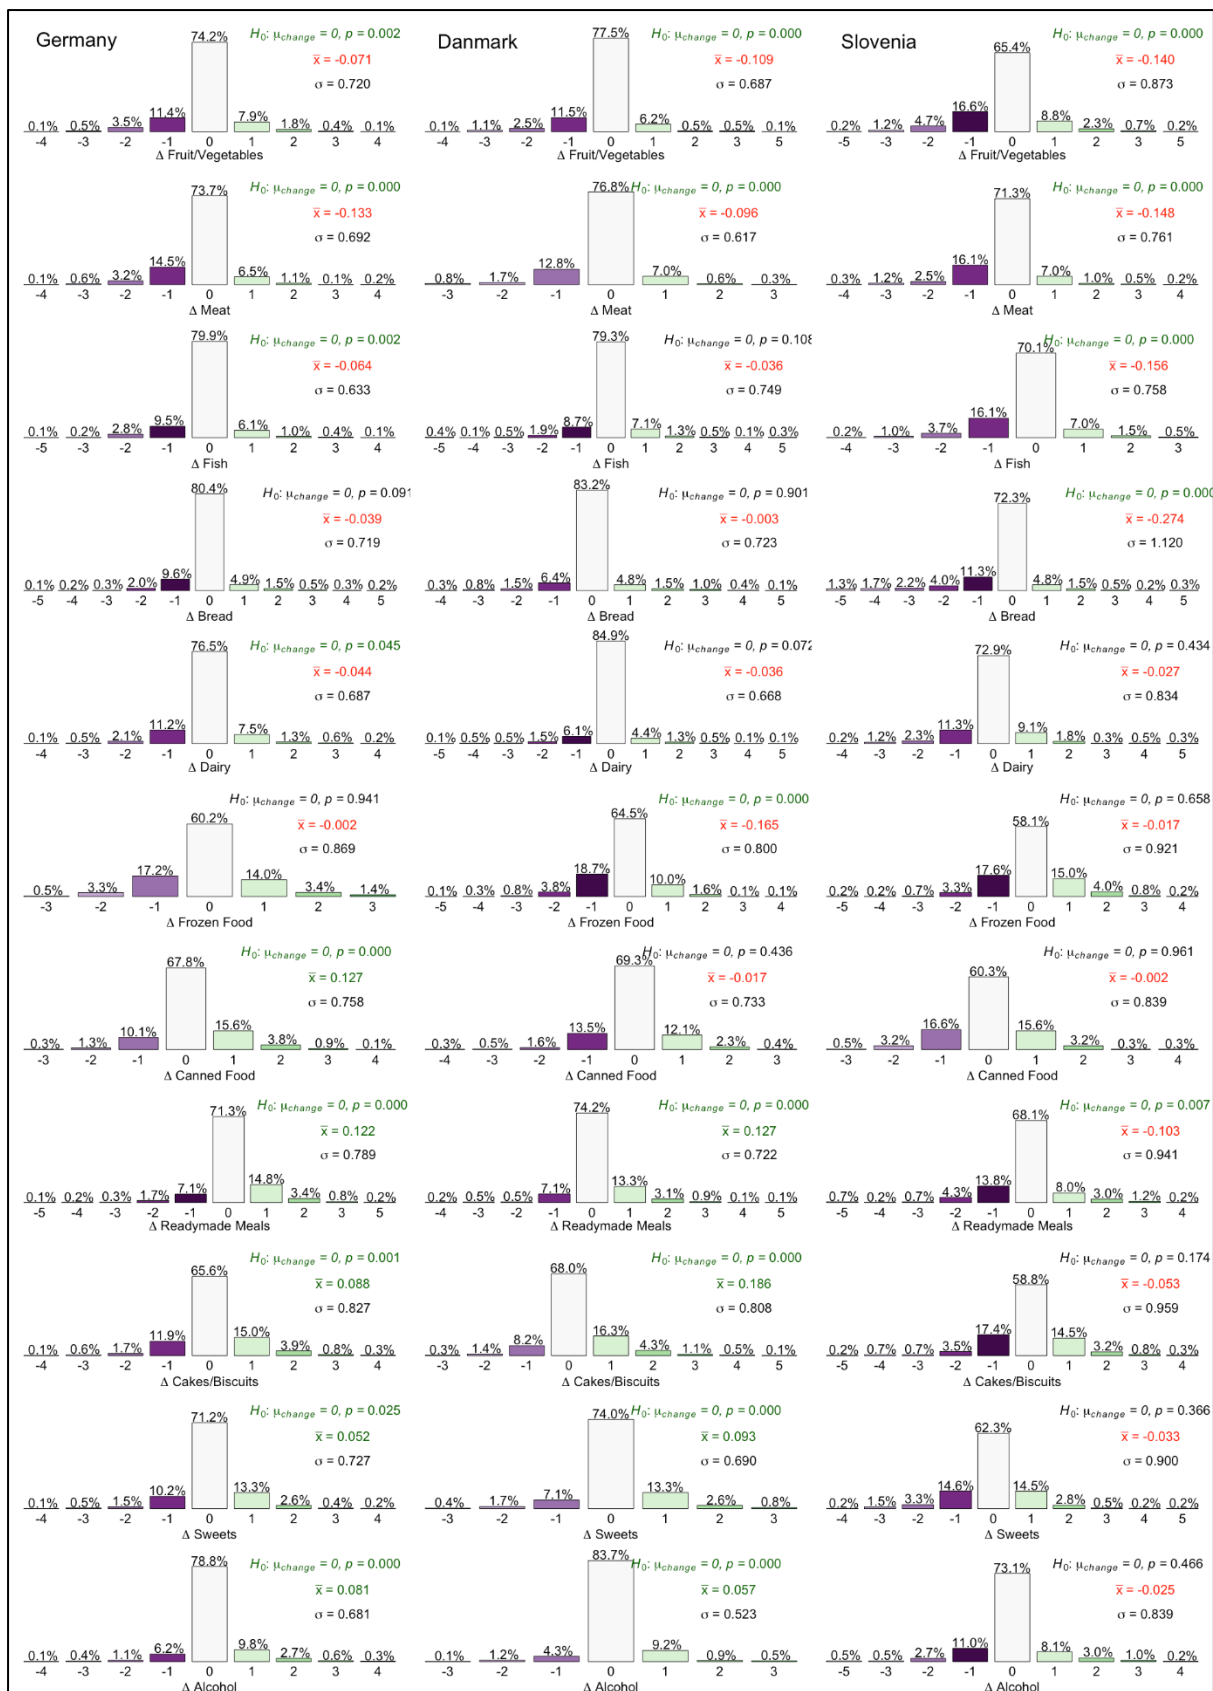

Figure S2: Changes in food consumption frequencies during the COVID-19 pandemic compared to before

Notes: Comparisons of mean consumption frequencies are based on paired-samples t-tests.
