# Supplementary material for: Changes in Food Consumption During the COVID-19 Pandemic: Analysis of Consumer Survey Data From the First Lockdown Period in Denmark, Germany, and Slovenia
Source: PubMed Central journal article supplement (PMC7982667; doi:10.3389/fnut.2021.635859), 2021-03-08
Supplement: Presentation_2.pdf [file Presentation_2.pdf]

## OUR RELATIONSHIP WITH FOOD DURING THE COVID-19 PANDEMIC

This short European-wide survey is designed to capture important aspects of your behavior and attitudes to food during this time of pandemic. Your participation will be highly appreciated and help us to understand how food systems, as a central aspect of our lives, can be improved for everyone's benefit over the longer term.

The questionnaire takes about **10-15 minutes** to complete.

Unless where clearly stated otherwise, please answer on behalf of all the people in or connected to your household who are typically involved together in obtaining, preparing and eating food, not just yourself as an individual. If there is someone else in your household who has more knowledge than you about some of the questions, please feel free to ask her or him. Please ensure that only one response is submitted per household.

Please note:

- The results of this research will be used for scientific purposes only and may be published.
- All data will be treated anonymously and confidentially at every stage of the research.
- Only general statistics will appear in reports.
- This questionnaire is 100% compliant with the EU's GDPR regulations. Please click [here](#) for more information.
- As an independent research initiative, it is entirely free from any political, commercial or vested interest.
- You have the right to discontinue the survey at any time.

I understand and accept the points stated above and wish to participate in this study.

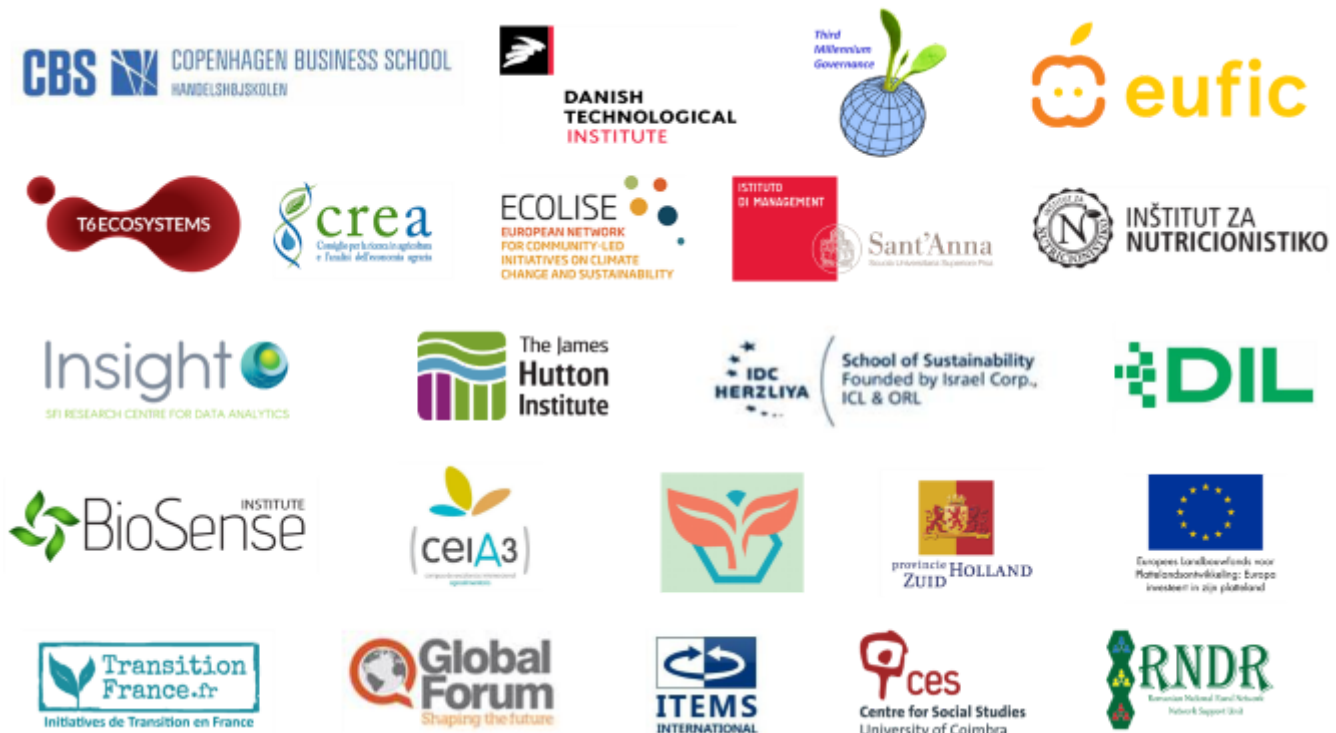

In the following questions, we are interested in your behaviour both **before** and **during** the Covid-19 pandemic.

By the term **during** Covid-19, we mean the **situation right now**.

**1. What are the main ways your household's food is obtained **before** and **during** Covid-19?**

Click as many options as are relevant!

**Before Covid-19**

- Own purchase
- Food banks, charities
- Grow own
- Other (please specify):

**During Covid-19**

- Own purchase
- Food banks, charities
- Grow own
- Other (please specify):

**2. What are the main sources of buying your household's FRESH VEGETABLES / FRUITS before and during Covid-19?**

Click as many options as are relevant!

**Before Covid-19**

- Big supermarkets
- Supermarkets
- Discount shops
- Bakeries, butchers, small grocery shops
- Organic shops
- Farm markets or street markets
- Cooperatively owned or solidarity shops
- Direct from local producer
- Home delivery (ordered online, by phone or in-person)
- Click this point to confirm you are not a robot
- Other (please specify):

**During Covid-19**

- Big supermarkets
- Supermarkets
- Discount shops
- Bakeries, butchers, small grocery shops
- Organic shops
- Farm markets or street markets
- Cooperatively owned or solidarity shops
- Direct from local producer
- Home delivery (ordered online, by phone or in-person)
- Other (please specify):

**3. What are the main sources of buying your household's OTHER FRESH PRODUCTS (MEAT, FISH, BREAD, MILK, CHEESE, ETC) before and during Covid-19?**

Click as many options as are relevant!

**Before Covid-19**

- Big supermarkets
- Supermarkets
- Discount shops
- Bakeries, butchers, small grocery shops
- Organic shops
- Farm markets or street markets
- Cooperatively owned or solidarity shops
- Direct from local producer
- Home delivery (ordered online, by phone or in-person)
- Other (please specify):

**During Covid-19**

- Big supermarkets
- Supermarkets
- Discount shops
- Bakeries, butchers, small grocery shops
- Organic shops
- Farm markets or street markets
- Cooperatively owned or solidarity shops
- Direct from local producer
- Home delivery (ordered online, by phone or in-person)
- Other (please specify):

**4. What are the main sources of buying your household's NON-FRESH FOOD( FROZEN, CANNED, PRE-COOKED, DRINKS, ETC) **before** and **during** Covid-19?**

Click as many options as are relevant!

**Before Covid-19**

- Big supermarkets
- Supermarkets
- Discount shops
- Bakeries, butchers, small grocery shops
- Organic shops
- Farm markets or street markets
- Cooperatively owned or solidarity shops
- Direct from local producer
- Home delivery (ordered online, by phone or in-person)
- Other (please specify):

**During Covid-19**

- Big supermarkets
- Supermarkets
- Discount shops
- Bakeries, butchers, small grocery shops
- Organic shops
- Farm markets or street markets
- Cooperatively owned or solidarity shops
- Direct from local producer
- Home delivery (ordered online, by phone or in-person)
- Other (please specify):

5. How often does your household typically obtain the following food types **before** and **during** Covid-19?

**Before Covid-19**

Fresh vegetables and fruit

|                                          |
|------------------------------------------|
| Daily                                    |
| 4 to 6 times a week                      |
| 2 to 3 times a week                      |
| Once a week                              |
| Between once a week and once a fortnight |
| Less than once a fortnight or never      |

Fresh meat and fish

|                                          |
|------------------------------------------|
| Daily                                    |
| 4 to 6 times a week                      |
| 2 to 3 times a week                      |
| Once a week                              |
| Between once a week and once a fortnight |
| Less than once a fortnight or never      |

Other fresh products (bread, milk, cheese, etc.)

|                                          |
|------------------------------------------|
| Daily                                    |
| 4 to 6 times a week                      |
| 2 to 3 times a week                      |
| Once a week                              |
| Between once a week and once a fortnight |
| Less than once a fortnight or never      |

Non-fresh food (frozen, canned, pre-cooked, drinks, etc)

|                                          |
|------------------------------------------|
| Daily                                    |
| 4 to 6 times a week                      |
| 2 to 3 times a week                      |
| Once a week                              |
| Between once a week and once a fortnight |
| Less than once a fortnight or never      |

Other (please specify):

|                                          |
|------------------------------------------|
| Daily                                    |
| 4 to 6 times a week                      |
| 2 to 3 times a week                      |
| Once a week                              |
| Between once a week and once a fortnight |
| Less than once a fortnight or never      |

## During Covid-19

### Fresh vegetables and fruit

|                                          |
|------------------------------------------|
| Daily                                    |
| 4 to 6 times a week                      |
| 2 to 3 times a week                      |
| Once a week                              |
| Between once a week and once a fortnight |
| Less than once a fortnight or never      |

### Fresh meat and fish

|                                          |
|------------------------------------------|
| Daily                                    |
| 4 to 6 times a week                      |
| 2 to 3 times a week                      |
| Once a week                              |
| Between once a week and once a fortnight |
| Less than once a fortnight or never      |

### Other fresh products (bread, milk, cheese, etc.)

|                                          |
|------------------------------------------|
| Daily                                    |
| 4 to 6 times a week                      |
| 2 to 3 times a week                      |
| Once a week                              |
| Between once a week and once a fortnight |
| Less than once a fortnight or never      |

### Non-fresh food (frozen, canned, pre-cooked, drinks, etc)

|                                          |
|------------------------------------------|
| Daily                                    |
| 4 to 6 times a week                      |
| 2 to 3 times a week                      |
| Once a week                              |
| Between once a week and once a fortnight |
| Less than once a fortnight or never      |

Other (please specify):

|                                          |
|------------------------------------------|
| Daily                                    |
| 4 to 6 times a week                      |
| 2 to 3 times a week                      |
| Once a week                              |
| Between once a week and once a fortnight |
| Less than once a fortnight or never      |

**6. Which meals are typically prepared and eaten at home by at least one member of your household each day before and during Covid-19?**

Click as many options as are relevant!

**Before Covid-19**

- Breakfast
- Midday meal
- Evening meal
- Random snacks
- Other (please specify):

**During Covid-19**

- Breakfast
- Midday meal
- Evening meal
- Random snacks
- Other (please specify):

**7. What are the main ways your household food is prepared before and during Covid-19?**

Click as many options as are relevant!

**Before Covid-19**

- Meals from the take away shop
- Take away meals from supermarket
- Ready to heat/cook meals
- Home-made mainly from processed ingredients
- Home-made mainly from raw ingredients
- Other (please specify):

**During Covid-19**

- Meals from the take away shop
- Take away meals from supermarket
- Ready to heat/cook meals
- Home-made mainly from processed ingredients
- Home-made mainly from raw ingredients
- Other (please specify):



## 8. How often do you personally eat the following food types **before** Covid-19?

(The During-Covid-19 options are in the next question)

### Before Covid-19

Fresh vegetables and fruit

|                                          |
|------------------------------------------|
| Daily                                    |
| 4 to 6 times a week                      |
| 2 to 3 times a week                      |
| Once a week                              |
| Between once a week and once a fortnight |
| Less than once a fortnight or never      |

Fresh meat

|                                          |
|------------------------------------------|
| Daily                                    |
| 4 to 6 times a week                      |
| 2 to 3 times a week                      |
| Once a week                              |
| Between once a week and once a fortnight |
| Less than once a fortnight or never      |

Fresh fish

|                                          |
|------------------------------------------|
| Daily                                    |
| 4 to 6 times a week                      |
| 2 to 3 times a week                      |
| Once a week                              |
| Between once a week and once a fortnight |
| Less than once a fortnight or never      |

Bread

|                                          |
|------------------------------------------|
| Daily                                    |
| 4 to 6 times a week                      |
| 2 to 3 times a week                      |
| Once a week                              |
| Between once a week and once a fortnight |
| Less than once a fortnight or never      |

Dairy products

|                                          |
|------------------------------------------|
| Daily                                    |
| 4 to 6 times a week                      |
| 2 to 3 times a week                      |
| Once a week                              |
| Between once a week and once a fortnight |
| Less than once a fortnight or never      |

Frozen food

|                                          |
|------------------------------------------|
| Daily                                    |
| 4 to 6 times a week                      |
| 2 to 3 times a week                      |
| Once a week                              |
| Between once a week and once a fortnight |
| Less than once a fortnight or never      |

Canned food

|                                          |
|------------------------------------------|
| Daily                                    |
| 4 to 6 times a week                      |
| 2 to 3 times a week                      |
| Once a week                              |
| Between once a week and once a fortnight |
| Less than once a fortnight or never      |

Ready-made meals

|                                          |
|------------------------------------------|
| Daily                                    |
| 4 to 6 times a week                      |
| 2 to 3 times a week                      |
| Once a week                              |
| Between once a week and once a fortnight |
| Less than once a fortnight or never      |

Cake and biscuits

|                                          |
|------------------------------------------|
| Daily                                    |
| 4 to 6 times a week                      |
| 2 to 3 times a week                      |
| Once a week                              |
| Between once a week and once a fortnight |
| Less than once a fortnight or never      |

Chocolate, candies

|                                          |
|------------------------------------------|
| Daily                                    |
| 4 to 6 times a week                      |
| 2 to 3 times a week                      |
| Once a week                              |
| Between once a week and once a fortnight |
| Less than once a fortnight or never      |

Wine, beer and other alcoholic drinks

|                                          |
|------------------------------------------|
| Daily                                    |
| 4 to 6 times a week                      |
| 2 to 3 times a week                      |
| Once a week                              |
| Between once a week and once a fortnight |
| Less than once a fortnight or never      |

Click "Once a week" to confirm you are not a robot

|                                          |
|------------------------------------------|
| Daily                                    |
| 4 to 6 times a week                      |
| 2 to 3 times a week                      |
| Once a week                              |
| Between once a week and once a fortnight |
| Less than once a fortnight or never      |

Other (please specify):

|                                          |
|------------------------------------------|
| Daily                                    |
| 4 to 6 times a week                      |
| 2 to 3 times a week                      |
| Once a week                              |
| Between once a week and once a fortnight |
| Less than once a fortnight or never      |

9. How often do you personally eat the following food types **during** Covid-19?

**During Covid-19**

Fresh vegetables and fruit

|                                          |
|------------------------------------------|
| Daily                                    |
| 4 to 6 times a week                      |
| 2 to 3 times a week                      |
| Once a week                              |
| Between once a week and once a fortnight |
| Less than once a fortnight or never      |

Fresh meat

|                                          |
|------------------------------------------|
| Daily                                    |
| 4 to 6 times a week                      |
| 2 to 3 times a week                      |
| Once a week                              |
| Between once a week and once a fortnight |
| Less than once a fortnight or never      |

Fresh fish

|                                          |
|------------------------------------------|
| Daily                                    |
| 4 to 6 times a week                      |
| 2 to 3 times a week                      |
| Once a week                              |
| Between once a week and once a fortnight |
| Less than once a fortnight or never      |

Bread

|                                          |
|------------------------------------------|
| Daily                                    |
| 4 to 6 times a week                      |
| 2 to 3 times a week                      |
| Once a week                              |
| Between once a week and once a fortnight |
| Less than once a fortnight or never      |

Dairy products

|                                          |
|------------------------------------------|
| Daily                                    |
| 4 to 6 times a week                      |
| 2 to 3 times a week                      |
| Once a week                              |
| Between once a week and once a fortnight |
| Less than once a fortnight or never      |

Frozen food

|                                          |
|------------------------------------------|
| Daily                                    |
| 4 to 6 times a week                      |
| 2 to 3 times a week                      |
| Once a week                              |
| Between once a week and once a fortnight |
| Less than once a fortnight or never      |

Canned food

|                                          |
|------------------------------------------|
| Daily                                    |
| 4 to 6 times a week                      |
| 2 to 3 times a week                      |
| Once a week                              |
| Between once a week and once a fortnight |
| Less than once a fortnight or never      |

Ready-made meals

|                                          |
|------------------------------------------|
| Daily                                    |
| 4 to 6 times a week                      |
| 2 to 3 times a week                      |
| Once a week                              |
| Between once a week and once a fortnight |
| Less than once a fortnight or never      |

Cake and biscuits

|                                          |
|------------------------------------------|
| Daily                                    |
| 4 to 6 times a week                      |
| 2 to 3 times a week                      |
| Once a week                              |
| Between once a week and once a fortnight |
| Less than once a fortnight or never      |

Chocolate, candies

|                                          |
|------------------------------------------|
| Daily                                    |
| 4 to 6 times a week                      |
| 2 to 3 times a week                      |
| Once a week                              |
| Between once a week and once a fortnight |
| Less than once a fortnight or never      |

Wine, beer and other alcoholic drinks

|                                          |
|------------------------------------------|
| Daily                                    |
| 4 to 6 times a week                      |
| 2 to 3 times a week                      |
| Once a week                              |
| Between once a week and once a fortnight |
| Less than once a fortnight or never      |

Other (please specify):

|                                          |
|------------------------------------------|
| Daily                                    |
| 4 to 6 times a week                      |
| 2 to 3 times a week                      |
| Once a week                              |
| Between once a week and once a fortnight |
| Less than once a fortnight or never      |

10. When eating away from home, how often do you personally use the following places before and during Covid-19?

Before Covid-19

Work canteens

|                                          |
|------------------------------------------|
| Daily                                    |
| 4 to 6 times a week                      |
| 2 to 3 times a week                      |
| Once a week                              |
| Between once a week and once a fortnight |
| Less than once a fortnight or never      |

Restaurants, Cafés, Hotels or similar

|                                          |
|------------------------------------------|
| Daily                                    |
| 4 to 6 times a week                      |
| 2 to 3 times a week                      |
| Once a week                              |
| Between once a week and once a fortnight |
| Less than once a fortnight or never      |

Street vendors

|                                          |
|------------------------------------------|
| Daily                                    |
| 4 to 6 times a week                      |
| 2 to 3 times a week                      |
| Once a week                              |
| Between once a week and once a fortnight |
| Less than once a fortnight or never      |

Free food in hostels or similar

|                                          |
|------------------------------------------|
| Daily                                    |
| 4 to 6 times a week                      |
| 2 to 3 times a week                      |
| Once a week                              |
| Between once a week and once a fortnight |
| Less than once a fortnight or never      |



Other (please specify!):

|                                          |
|------------------------------------------|
| Daily                                    |
| 4 to 6 times a week                      |
| 2 to 3 times a week                      |
| Once a week                              |
| Between once a week and once a fortnight |
| Less than once a fortnight or never      |

## During Covid-19

### Work canteens

|                                          |
|------------------------------------------|
| Daily                                    |
| 4 to 6 times a week                      |
| 2 to 3 times a week                      |
| Once a week                              |
| Between once a week and once a fortnight |
| Less than once a fortnight or never      |

### Restaurants, Cafés, Hotels or similar

|                                          |
|------------------------------------------|
| Daily                                    |
| 4 to 6 times a week                      |
| 2 to 3 times a week                      |
| Once a week                              |
| Between once a week and once a fortnight |
| Less than once a fortnight or never      |

### Street vendors

|                                          |
|------------------------------------------|
| Daily                                    |
| 4 to 6 times a week                      |
| 2 to 3 times a week                      |
| Once a week                              |
| Between once a week and once a fortnight |
| Less than once a fortnight or never      |

### Free food in hostels or similar

|                                          |
|------------------------------------------|
| Daily                                    |
| 4 to 6 times a week                      |
| 2 to 3 times a week                      |
| Once a week                              |
| Between once a week and once a fortnight |
| Less than once a fortnight or never      |

Other (please specify!):

|                                          |
|------------------------------------------|
| Daily                                    |
| 4 to 6 times a week                      |
| 2 to 3 times a week                      |
| Once a week                              |
| Between once a week and once a fortnight |
| Less than once a fortnight or never      |

In the questions on the following pages, we are interested in your household's behaviour and attitudes to food **during** the COVID-19 pandemic in comparison with **before** it started.

**11. How much has your household's food behaviour changed during the Covid-19 pandemic compared with before?**

How much food is eaten

|               |
|---------------|
| Much more     |
| A little more |
| No Change     |
| A little less |
| Much less     |

How much money is spent on food

|               |
|---------------|
| Much more     |
| A little more |
| No Change     |
| A little less |
| Much less     |

How much unpackaged food is obtained (e.g. fruit and vegetables, bread, other bulk food)

|               |
|---------------|
| Much more     |
| A little more |
| No Change     |
| A little less |
| Much less     |

How much food is obtained from local producers

|               |
|---------------|
| Much more     |
| A little more |
| No Change     |
| A little less |
| Much less     |

How much organic food is obtained

|               |
|---------------|
| Much more     |
| A little more |
| No Change     |
| A little less |
| Much less     |

How much food is thrown away

|               |
|---------------|
| Much more     |
| A little more |
| No Change     |
| A little less |
| Much less     |

How varied is the range of food eaten

|               |
|---------------|
| Much more     |
| A little more |
| No Change     |
| A little less |
| Much less     |

The extent to which you plan meals and/or your grocery list in advance

|               |
|---------------|
| Much more     |
| A little more |
| No Change     |
| A little less |
| Much less     |

How often new recipes and/or ingredients are used

|               |
|---------------|
| Much more     |
| A little more |
| No Change     |
| A little less |
| Much less     |

The overall importance of food in your daily life

|               |
|---------------|
| Much more     |
| A little more |
| No Change     |
| A little less |
| Much less     |

How far do you travel to food shops

|               |
|---------------|
| Much more     |
| A little more |
| No Change     |
| A little less |
| Much less     |

How much alcohol is consumed

|               |
|---------------|
| Much more     |
| A little more |
| No Change     |
| A little less |
| Much less     |

12. Has anyone in your household missed a meal because there is not enough food in the house **before** and **during** Covid-19?

**Before Covid-19**

- Frequently
- Occasionally
- Never

**During Covid-19**

- Frequently
- Occasionally
- Never

13. Has anyone in your household been anxious about obtaining enough food to meet their requirements **before** and **during** Covid-19?

**Before Covid-19**

- Frequently
- Occasionally
- Never

**During Covid-19**

- Frequently
- Occasionally
- Never

**14. Has your household income changed as a result of Covid-19?**

- Yes
- No

**15. Does anyone in your household have any special dietary needs?**

- Yes
- No

**16. Does your household stock-up on food more than in the period before Covid-19?**

- Yes
- No

**17. Have person(s) in your household responsible for obtaining or preparing food in your household changed during the Covid-19 pandemic?**

- Yes
- No

**18. Is any member of your household active in, or in any way closely related to, the production, processing, distribution or delivery of food to other people apart from your own household members?**

- Yes
- No

**19. Have there been any other changes in your household's behaviour related to food before vs. during the Covid-19 pandemic?**

- Yes
- No

**20. Have there been any other changes in your household's attitudes to food (including any lifestyle changes) before as compared to during the Covid-19 pandemic?**

- Yes
- No



**Please explain how your income has changed:**

**Please explain which special dietary needs:**

**What types of food do you stock more:**

**Please explain the changes of the specific person(s) in responsibility for obtaining or preparing food:**

**Please explain in which way member(s) of your household are related to production, processing, distribution or delivery of food:**

**Please explain those other changes due to Covid-19:**

**Please explain the attitude changes due to Covid-19:**

**21. Do you expect that any of the changes in your household's behaviour and attitudes to food during Covid-19 will continue after other aspects of your household's daily life have returned to what they were before Covid-19? - Part I**

Please indicate whether any of the changes in the following areas will continue:

Types of shops used

|                            |
|----------------------------|
| Definitely yes             |
| Probably yes               |
| Don't know                 |
| Probably no                |
| Definitely no              |
| <i>There was no change</i> |

Purchasing frequency

|                            |
|----------------------------|
| Definitely yes             |
| Probably yes               |
| Don't know                 |
| Probably no                |
| Definitely no              |
| <i>There was no change</i> |

The money spent on food

|                            |
|----------------------------|
| Definitely yes             |
| Probably yes               |
| Don't know                 |
| Probably no                |
| Definitely no              |
| <i>There was no change</i> |

Behaviour concerning growing own food

|                            |
|----------------------------|
| Definitely yes             |
| Probably yes               |
| Don't know                 |
| Probably no                |
| Definitely no              |
| <i>There was no change</i> |

Other means of obtaining food

|                            |
|----------------------------|
| Definitely yes             |
| Probably yes               |
| Don't know                 |
| Probably no                |
| Definitely no              |
| <i>There was no change</i> |

Types of food and dishes

|                            |
|----------------------------|
| Definitely yes             |
| Probably yes               |
| Don't know                 |
| Probably no                |
| Definitely no              |
| <i>There was no change</i> |

Behaviour concerning food waste

|                            |
|----------------------------|
| Definitely yes             |
| Probably yes               |
| Don't know                 |
| Probably no                |
| Definitely no              |
| <i>There was no change</i> |

Click "Probably no" in this line to confirm you are not a robot

|                            |
|----------------------------|
| Definitely yes             |
| Probably yes               |
| Don't know                 |
| Probably no                |
| Definitely no              |
| <i>There was no change</i> |

**22. Do you expect that any of the changes in your household's behaviour and attitudes to food during Covid-19 will continue after other aspects of your household's daily life have returned to what they were before Covid-19? - Part II**

Please indicate whether any of the changes in the following areas will continue.

Alcohol consumption

|                            |
|----------------------------|
| Definitely yes             |
| Probably yes               |
| Don't know                 |
| Probably no                |
| Definitely no              |
| <i>There was no change</i> |

Preparing food

|                            |
|----------------------------|
| Definitely yes             |
| Probably yes               |
| Don't know                 |
| Probably no                |
| Definitely no              |
| <i>There was no change</i> |

Where food is eaten

|                            |
|----------------------------|
| Definitely yes             |
| Probably yes               |
| Don't know                 |
| Probably no                |
| Definitely no              |
| <i>There was no change</i> |

The person(s) in your household responsible for food

|                            |
|----------------------------|
| Definitely yes             |
| Probably yes               |
| Don't know                 |
| Probably no                |
| Definitely no              |
| <i>There was no change</i> |

Travel distance to food shops

|                            |
|----------------------------|
| Definitely yes             |
| Probably yes               |
| Don't know                 |
| Probably no                |
| Definitely no              |
| <i>There was no change</i> |

Obtaining food from local producers

|                            |
|----------------------------|
| Definitely yes             |
| Probably yes               |
| Don't know                 |
| Probably no                |
| Definitely no              |
| <i>There was no change</i> |

Overall attitudes towards food

|                            |
|----------------------------|
| Definitely yes             |
| Probably yes               |
| Don't know                 |
| Probably no                |
| Definitely no              |
| <i>There was no change</i> |

Other (please specify):

|                            |
|----------------------------|
| Definitely yes             |
| Probably yes               |
| Don't know                 |
| Probably no                |
| Definitely no              |
| <i>There was no change</i> |

**23. Which changes have there been in local and national regulations, commercial or other changes resulting from the Covid-19 pandemic beyond your control?**

|                                                                                    | Yes                   | No                    | Don't know            |
|------------------------------------------------------------------------------------|-----------------------|-----------------------|-----------------------|
| Travel and movement restrictions                                                   | <input type="radio"/> | <input type="radio"/> | <input type="radio"/> |
| Closure or restrictions on public transport                                        | <input type="radio"/> | <input type="radio"/> | <input type="radio"/> |
| Closure of restaurants, cafés, canteens                                            | <input type="radio"/> | <input type="radio"/> | <input type="radio"/> |
| Closure of your (physical) workplace                                               | <input type="radio"/> | <input type="radio"/> | <input type="radio"/> |
| Partial or full closure of school, educational institutions, day-care institutions | <input type="radio"/> | <input type="radio"/> | <input type="radio"/> |
| Closure of other public places                                                     | <input type="radio"/> | <input type="radio"/> | <input type="radio"/> |
| Restrictions on numbers of people in one place                                     | <input type="radio"/> | <input type="radio"/> | <input type="radio"/> |
| Other (please specify): <input type="text"/>                                       | <input type="radio"/> | <input type="radio"/> | <input type="radio"/> |

**If yes, please indicate the impact of these changes on your household's behaviour and attitudes to food below.**

**24. Do any members of your household have Covid-19 or symptoms consistent with Covid-19 (or have they had these)?**

- Yes
- No

**25. Are any members of your household in isolation or in quarantine because of Covid-19 (or have they been)?**

- Yes
- No

**26. Are any members of your household in hospital because of Covid-19? (or have they been)?**

- Yes
- No



**27. What is your own perception of the risks of Covid-19?**

The likelihood of any member of your household to become infected by the virus.

|           |
|-----------|
| Very high |
| High      |
| Medium    |
| Low       |
| Very low  |

The likely severity of the virus for any member of your household (please refer to the person with the highest likely severity).

|           |
|-----------|
| Very high |
| High      |
| Medium    |
| Low       |
| Very low  |

The level of your anxiety concerning the potential impact of the virus on your household.

|           |
|-----------|
| Very high |
| High      |
| Medium    |
| Low       |
| Very low  |

Other (please specify):

|           |
|-----------|
| Very high |
| High      |
| Medium    |
| Low       |
| Very low  |

To end this survey, we would like to know some facts about you. (Note: only you as respondent)

---

**28. Your Gender**

 

**29. Your age in years:**

 

**30. What is the highest educational qualification you have personally obtained?**

 

**31. How many people in the following age groups live in your household (that your previous answers about food refer to), including yourself:**

|               |                      |
|---------------|----------------------|
| 0-4 Years     | <input type="text"/> |
| 5-9 Years     | <input type="text"/> |
| 10-19 Years   | <input type="text"/> |
| 20-29 Years   | <input type="text"/> |
| 30-39 Years   | <input type="text"/> |
| 40-49 Years   | <input type="text"/> |
| 50-59 Years   | <input type="text"/> |
| 60-69 Years   | <input type="text"/> |
| 70-79 Years   | <input type="text"/> |
| Over 79 Years | <input type="text"/> |

**32. Please indicate your postcode:**

33. Please choose your country here, if you are coming from Europe:

 

34. Please choose your country here, if you are coming from outside Europe:

 

**Thank you for completing this questionnaire!**

We would like to thank you very much for helping us.

Please add your email address here if you wish to receive more information about this study:

submit

Your answers were transmitted, you may close the browser window or tab now.

Deutsches Institut für Lebensmitteltechnik e. V.
